# Supplementary material
Source: PubMed Central journal article supplement (PMC1896060)
Supplement: 97320630001436S1.pdf [file 97320630001436S1.pdf]

# Bioinformatics

by Biomedical Informatics Publishing Group

The following notation will be used throughout.  $R$  denotes the real line,  $m$  denotes the number of tests (probes), and  $:=$  indicates equal by definition.  $I(\cdot)$  denotes the indicator function; it takes value 1 if the statement enclosed in the parentheses is true, 0 otherwise. Convergence and convergence in probability are denoted by  $\rightarrow$  and  $\rightarrow_p$  respectively. A random variable is usually denoted by an upper-case letter such as  $P$ ,  $R$ ,  $V$ , etc. A cumulative distribution function (cdf) is denoted by  $F$ ,  $G$  or  $H$ ; an empirical distribution function (EDF) is indicated by a tilde, e.g.,  $\tilde{F}$ . A population parameter is denoted by a lower-case Greek letter and a hat indicates an estimator of the parameter, e.g.,  $\hat{\theta}$ . Asymptotic equivalence is denoted by  $\cong$ :  $a_n \cong b_n$  as  $n \rightarrow \infty$  means  $\lim_{n \rightarrow \infty} a_n / b_n = 1$ .
