# Supplementary material
Source: PubMed Central journal article supplement (PMC1896060)
Supplement: 97320630001436S3.pdf [file 97320630001436S3.pdf]

### 3.1 The linear step-up procedure

Let  $P_{1:m} \leq P_{2:m} \leq \dots \leq P_{m:m}$  be the order statistics of the P values, and let  $\pi_0 = m_0/m$ . Assuming that the P values corresponding to the true null hypotheses are independent, Benjamini and Hochberg (1995) prove that for any specified  $q^* \in (0, 1)$ , rejecting all the null hypotheses corresponding to  $P_{1:m}, \dots, P_{k^*:m}$  with  $k^* = \max\{k : P_{k:m} / (k/m) \leq q^*\}$  controls the FDR at the level  $\pi_0 q^*$ , i.e.,  $FDR_{\Theta}(\hat{\Theta}(P_{k^*:m})) \leq \pi_0 q^* \leq q^*$  in the notation given in Section 2. [6] Note this procedure is equivalent to applying the data-driven threshold  $\alpha = P_{k^*:m}$  to all P values in (3), i.e.,  $HT(P_{k^*:m})$ .

### 3.2 Adaptive FDR control

Recognizing the potential of constructing less conservative FDR control by the above procedure, Benjamini and Hochberg (2000) propose an estimator of  $m_0$ ,  $\hat{m}_0$ , (hence an estimator of  $\pi_0$ ,  $\hat{\pi}_0 = \hat{m}_0 / m$ ), and replace  $k / m$  by  $k / \hat{m}_0$  in determining  $k^*$ . [10] They call this procedure adaptive FDR control. The estimator  $\hat{\pi}_0 = \hat{m}_0 / m$  will be discussed in Section 4. A recent development of adaptive FDR control can be found in Benjamini *et al.* (2006). [18]

### 3.3 Another adaptive FDR control

Storey (2002) [7] considers the FDR estimator  $\widehat{FDR}(\alpha) := \frac{\hat{\pi}_0(\lambda)\alpha}{\max\{R(\alpha), 1\} / m}$  for a P value cut-off  $\alpha$ , where  $\hat{\pi}_0(\lambda)$  is an estimator of  $\pi_0$  (See Section 4.1) and  $R(\alpha)$  is the number of P values less than or equal to  $\alpha$ . FDR control can be performed by “inverting” this estimator: for a given FDR level  $q^*$ , find the largest possible  $\hat{\alpha}$  such that  $\widehat{FDR}(\hat{\alpha}) \leq q^*$ , and reject all the null hypotheses with  $P \leq \hat{\alpha}$ . This operation can be represented in a “q-value style”. Let  $q_i := \inf_{j \geq i} \{\widehat{FDR}(P_{j:m})\}$ ,  $i = 1, \dots, m$ ; then reject all the null hypotheses for which  $q_i \leq q^*$ . Storey *et al.* (2004) [8] show that using a slightly modified version of  $\widehat{FDR}(\cdot)$  this procedure guarantees to control the FDR under  $q^*$  if the P values corresponding to the true null hypotheses are independent.

### 3.4 Dependent Tests

Storey *et al.* (2004) [8] show that if the P values are weakly dependent in the sense of being dependent in general but satisfying certain ergodicity conditions as  $m \rightarrow \infty$ , then the procedure is conservative in the limit in the sense that  $\lim_{m \rightarrow \infty} \hat{\alpha} < \lim_{m \rightarrow \infty} \alpha^*$  where  $\alpha^*$  is the largest possible  $\alpha$  such that the actual  $FDR(\alpha) \leq q^*$ .

Yekutieli and Benjamini (1999) [19] develop a resampling-based approach to FDR control for correlated tests. Qiu *et al.* (2005) [20] also describe the use of resampling to assess the stability of gene selection in microarray analysis. Benjamini and Yekutieli (2001) [13] show that the Benjamini and Hochberg (1995) [6] procedure controls the FDR if the test statistics satisfy the “positive regression dependence” condition. They also introduce a very conservative, but universal procedure that guarantees the FDR control for arbitrary P values (dependent or independent, discrete or continuous): control the FDR at the level  $q^{**} = \left(\sum_{i=1}^m (1/i)\right)^{-1} q^*$  with the Benjamini and Hochberg (1995) [6] procedure guarantees to control the FDR at level  $q^*$  regardless dependence and/or discreteness of the P values.

In a series of papers, van der Laan and colleagues [21, 22] and Dudot and colleagues [23] developed procedures to control the gFWER for arbitrarily dependent tests.
