# Supplementary material
Source: PubMed Central journal article supplement (PMC1896060)
Supplement: 97320630001436S6.pdf [file 97320630001436S6.pdf]

## 6.1 Profile information criteria

Abramovich *et al.* (2000) [36] consider theoretically thresholding estimators of a sequence of Normal distribution means, where the threshold is determined by a lack of fit criterion ( $L^p$  distance) penalized by FDR. They show that the estimators are asymptotically minimax. Regarding massive multiple tests as the estimation problem described in Section 2, Cheng *et al.* (2004) [24] develop criteria to determine the significance threshold  $\alpha$  for the  $HT(\alpha)$  procedure (3). The *profile information* ( $I_p$ ) criterion consists of a lack-of-fit term of the P value ensemble quantile function from  $U(0, 1)$  penalized by the expected number of false discoveries under model (1). Empirically, the lack-of-fit term is defined

$$\text{by } \tilde{D}(\alpha) = \sqrt{m} \left\{ \int_0^\alpha [t - \tilde{Q}_m(t)]_+^2 dt \right\}^{1/2}, \alpha \in (0, 1],$$

where  $\tilde{Q}_m(\cdot)$  is the P value EQF (cf. Section 4) and  $[x]_+$  denotes the positive part of  $x$ , i.e.,  $[x]_+ = \max\{x, 0\}$ . So  $\tilde{D}(\alpha)$  measures how far are the P value sample quantiles below the diagonal line on the interval  $(0, \alpha]$ . Empirically the profile information criterion  $I_p$  is given by

$$\tilde{I}_p(\alpha) = [\tilde{D}(\alpha)]^{-1} + \lambda(m, \hat{\pi}_0) m \hat{\pi}_0 \alpha, \quad \alpha \in (0, 1)$$

Here  $m \hat{\pi}_0 \alpha$  is an estimate of the expected number of false positives,  $\lambda(m, \hat{\pi}_0)$  is a penalty factor, and  $[\tilde{D}(\alpha)]^{-1}$  measures the deviation of the P values from the  $U(0, 1)$  distribution. The more concentrated are the P values toward zero, the larger is  $[\tilde{D}(\alpha)]$  and thus the smaller is  $[\tilde{D}(\alpha)]^{-1}$ ; therefore one minimizes  $\tilde{I}_p(\alpha)$  with respect to  $\alpha$ . So the data-driven “optimal” significance threshold is the  $\hat{\alpha}^*$  that minimizes  $\tilde{I}_p(\alpha)$ ; and the  $HT(\hat{\alpha}^*)$  procedure rejects  $H_{i0}$  if  $P_i \leq \hat{\alpha}^*$ . Cheng (2006) [15] extends  $I_p$  by introducing the *adaptive profile information* (API) criterion based on the quantile model  $Q_m^*(u) = I(0 \leq u \leq \tau)(\nu u^\gamma + \delta u) + I(\tau_m \leq u \leq 1)(\beta_0 + \beta_{1u})$  (cf. Section 4.3). API is defined as

$$API(\alpha) := \left[ \int_0^\alpha (t - Q_m^*(t))^\gamma dt \right]^{-1/\gamma} + \lambda(m, \pi_0, \delta) m \pi_0 \alpha, \quad \alpha \in (0, 1)$$

Here the major modification is on the lack-of-fit term: the  $L^2$  norm is replaced by the  $L^\gamma$  norm. Recall that  $\gamma \geq 1$  is a parameter reflecting how far the P value quantiles are below the  $U(0, 1)$  quantiles in the vicinity of zero. The  $L^\gamma$  norm emphasizes this deviation and makes the criterion more adaptive to the P value behavior around zero. Cheng (2006) [15] considers an approximation of the lack-of-fit term that simplifies both theoretical development and computation in practice, and proposes a procedure to estimate the parameters in API. The data-driven optimal significance threshold  $\hat{\alpha}^*$  is the  $\alpha$  that minimizes an approximate API with estimated parameters in  $Q_m^*(\cdot)$ .

A key issue is the choice of the penalty factor  $\lambda$ . Cheng *et al.* (2004) [24] and Cheng (2006) [15] consider a few conservative choices and show for  $\pi_0 < 1$  the pERR of the  $HT(\hat{\alpha}^*)$  procedure (3) diminishes to zero as  $m \rightarrow \infty$  regardless the dependence among the P values; and for  $\pi_0 \leq 1$  the ERR diminishes to zero as  $m \rightarrow \infty$  if the P values possess certain dependence structure. The simulation studies therein indicate that these choices perform well when there is substantial power to reject the false null hypothesis in a number of individual tests, and they tend to be conservative when the power is low. Moreover, in a range of scenarios API moderately outperforms  $I_p$ .

## 6.2 Total error proportion

Pounds and Morris (2003) [28] observe that given a threshold  $\alpha$ , the area under the P value density function can be partitioned into four distinct regions corresponding to the four hypothesis testing outcomes resulted from the  $HT(\alpha)$  procedure (3). More specifically, the area to the left of  $\alpha$  corresponds to rejections and the area below  $\pi_0$  can be attributed to the  $U(0, 1)$  distribution. Thus, assuming that the null distribution of the P values is  $U(0, 1)$ , the area left of  $\alpha$  and below  $\pi_0$  corresponds to Type I errors, the area left of  $\alpha$  and above  $\pi_0$  corresponds to correct rejections, the area above  $\pi_0$  and right of  $\alpha$  corresponds to Type II errors, and the area below  $\pi_0$  and right of  $\alpha$  corresponds to correct non-rejections. In particular, under model (1) the expected proportion of tests resulting in a Type I error is given by  $FP(\alpha) = \pi_0 \alpha$ . Additionally, the expected proportion of tests resulting in a Type II error is given by  $FN(\alpha) = (1 - \pi_0)(1 - Hm(\alpha))$ . The *total error proportion*

# Bioinformatics

by Biomedical Informatics Publishing Group

is the sum  $TE(\alpha) = FP(\alpha) + FN(\alpha)$ , which is the expected proportion of tests resulting in a Type I or Type II error. Cheng *et al.* (2004) [24] use the term “total error criterion” and Genovese and Wasserman (2002) [11] use the term “total misclassification risk” to describe the total error proportion.

In practice, an estimate of the total error proportion can be used as a criterion to guide the selection of  $\alpha$ . An estimate of  $TE(\alpha)$  can be obtained by substituting estimates for the terms in FP and FN. Then, the value of  $\alpha$  that minimizes this TE estimate can be easily determined. The TE estimators can be nonparametric [24] or parametric with the mixture models. [27, 28] Let  $\hat{\alpha}_{TE}$  be the  $\alpha$  so obtained.

Using  $\hat{\alpha}_{TE}$  to declare significance has some useful operating characteristics. First, if the estimate of  $F_m(\cdot)$ ,  $\hat{F}_m(t) = t$  for all  $t$  (indicating an all null case), then  $\hat{\alpha}_{TE} = 0$  (no rejections are made). Additionally,  $\hat{\alpha}_{TE}$  corresponds to a 50% empirical Bayes probability that the null hypothesis is true. [28]
